# Supplementary material for: The Food-Specific Serum IgG Reactivity in Major Depressive Disorder Patients, Irritable Bowel Syndrome Patients and Healthy Controls
Source: MDPI journal article supplement (doi:10.3390/nu10050548), 2018-04-28
Supplement: s1 [file s1]

**Table S1.** Types of diets followed by participants in the past

| Study group | Type of diet<br>number of subjects (%) |                    |                  |           |
|-------------|----------------------------------------|--------------------|------------------|-----------|
|             | No diet                                | Caloric restricted | Elimination diet | Other     |
| MDD         | 13 (59.09)                             | 2 (9.09)           | 6 (27.27)        | 1 (4.55)  |
| IBS         | 8 (36.37)                              | 2 (9.09)           | 6 (27.27)        | 6 (27.27) |
| HC          | 15 (71.43)                             | 1 (4.76)           | 4 (19.05)        | 1 (4.76)  |
