# Supplementary material for: The Food-Specific Serum IgG Reactivity in Major Depressive Disorder Patients, Irritable Bowel Syndrome Patients and Healthy Controls
Source: MDPI journal article supplement (doi:10.3390/nu10050548), 2018-04-28
Supplement: s1 [file s1]

**Table S3.** Frequency of elevated IgG levels in examined groups

| IgG         | Level                  | MDD        | IBS        | HC          |
|-------------|------------------------|------------|------------|-------------|
|             |                        | n (%)      | n (%)      | n (%)       |
| Broccoli    | not elevated           | 17 (77.27) | 19 (86.36) | 21 (100.00) |
|             | elevated               | 4 (18.18)  | 3 (13.64)  | 0 (0.00)    |
|             | significantly elevated | 1 (4.55)   | 0 (0.00)   | 0 (0.00)    |
| Carrot      | not elevated           | 14 (63.64) | 20 (90.91) | 21 (100.00) |
|             | elevated               | 5 (22.73)  | 2 (9.09)   | 0 (0.00)    |
|             | significantly elevated | 3 (13.64)  | 0 (0.00)   | 0 (0.00)    |
| Red cabbage | not elevated           | 15 (68.18) | 19 (86.36) | 20 (95.24)  |
|             | elevated               | 4 (18.18)  | 3 (13.64)  | 1 (4.76)    |
|             | significantly elevated | 3 (13.64)  | 0 (0.00)   | 0 (0.00)    |
| Cucumber    | not elevated           | 17 (77.27) | 18 (81.82) | 20 (95.24)  |
|             | elevated               | 4 (18.18)  | 4 (18.18)  | 1 (4.76)    |
|             | significantly elevated | 1 (4.55)   | 0 (0.00)   | 0 (0.00)    |
| Bell pepper | not elevated           | 16 (72.73) | 16 (72.73) | 18 (85.71)  |
|             | elevated               | 5 (22.73)  | 5 (22.73)  | 3 (14.29)   |
|             | significantly elevated | 1 (4.55)   | 1 (4.55)   | 0 (0.00)    |
| Tomatoes    | not elevated           | 18 (81.82) | 17 (77.27) | 19 (90.48)  |
|             | elevated               | 3 (13.64)  | 4 (18.18)  | 1 (4.76)    |
|             | significantly elevated | 1 (4.55)   | 1 (4.55)   | 1 (4.76)    |
| Celery      | not elevated           | 13 (59.09) | 16 (72.73) | 21 (100.00) |
|             | elevated               | 6 (27.27)  | 6 (27.27)  | 0 (0.00)    |
|             | significantly elevated | 3 (13.64)  | 0 (0.00)   | 0 (0.00)    |
| Soy beans   | not elevated           | 18 (81.82) | 19 (86.36) | 20 (95.24)  |
|             | elevated               | 4 (18.18)  | 2 (9.09)   | 1 (4.76)    |
|             | significantly elevated | 0 (0.00)   | 1 (4.55)   | 0 (0.00)    |
| Pineapple   | not elevated           | 16 (72.73) | 15 (68.18) | 16 (76.19)  |
|             | elevated               | 5 (22.73)  | 5 (22.73)  | 5 (23.81)   |
|             | significantly elevated | 1 (4.55)   | 2 (9.09)   | 0 (0.00)    |
| Watermelon  | not elevated           | 16 (72.73) | 19 (86.36) | 20 (95.24)  |
|             | elevated               | 4 (18.18)  | 3 (13.64)  | 1 (4.76)    |
|             | significantly elevated | 2 (9.09)   | 0 (0.00)   | 0 (0.00)    |
| Cherry      | not elevated           | 15 (68.18) | 19 (86.36) | 19 (90.48)  |
|             | elevated               | 4 (18.18)  | 2 (9.09)   | 2 (9.52)    |
|             | significantly elevated | 3 (13.64)  | 1 (4.55)   | 0 (0.00)    |
| Horseradish | not elevated           | 17 (77.27) | 19 (86.36) | 21 (100.00) |
|             | elevated               | 3 (13.64)  | 3 (13.64)  | 0 (0.00)    |
|             | significantly elevated | 2 (9.09)   | 0 (0.00)   | 0 (0.00)    |

|               |                        |             |             |             |
|---------------|------------------------|-------------|-------------|-------------|
| Garlic        | not elevated           | 14 (63.64)  | 17 (77.27)  | 19 (90.48)  |
|               | elevated               | 5 (22.73)   | 5 (22.73)   | 2 (9.52)    |
|               | significantly elevated | 3 (13.64)   | 0 (0.00)    | 0 (0.00)    |
| Mustard seeds | not elevated           | 20 (90.91)  | 21 (95.45)  | 20 (95.24)  |
|               | elevated               | 2 (9.09)    | 1 (4.55)    | 1 (4.76)    |
|               | significantly elevated | 0 (0.00)    | 0 (0.00)    | 0 (0.00)    |
| Pork          | not elevated           | 22 (100.00) | 20 (90.91)  | 19 (90.48)  |
|               | elevated               | 0 (0.00)    | 2 (9.09)    | 2 (9.52)    |
|               | significantly elevated | 0 (0.00)    | 0 (0.00)    | 0 (0.00)    |
| Beef          | not elevated           | 21 (95.45)  | 21 (95.45)  | 21 (100.00) |
|               | elevated               | 0 (0.00)    | 1 (4.55)    | 0 (0.00)    |
|               | significantly elevated | 1 (4.55)    | 0 (0.00)    | 0 (0.00)    |
| Chicken       | not elevated           | 19 (86.36)  | 20 (90.91)  | 19 (90.48)  |
|               | elevated               | 3 (13.64)   | 2 (9.09)    | 2 (9.52)    |
|               | significantly elevated | 0 (0.00)    | 0 (0.00)    | 0 (0.00)    |
| Egg           | not elevated           | 5 (22.73)   | 4 (18.18)   | 3 (14.29)   |
|               | elevated               | 5 (22.73)   | 6 (27.27)   | 7 (33.33)   |
|               | significantly elevated | 12 (54.55)  | 12 (54.55)  | 11 (52.38)  |
| Gluten        | not elevated           | 2 (9.09)    | 8 (36.36)   | 7 (33.33)   |
|               | elevated               | 11 (50.00)  | 10 (45.45)  | 11 (52.38)  |
|               | significantly elevated | 9 (40.91)   | 4 (18.18)   | 3 (14.29)   |
| Barley        | not elevated           | 14 (63.64)  | 15 (68.18)  | 16 (76.19)  |
|               | elevated               | 4 (18.18)   | 6 (27.27)   | 5 (23.81)   |
|               | significantly elevated | 4 (18.18)   | 1 (4.55)    | 0 (0.00)    |
| Oat           | not elevated           | 15 (68.18)  | 14 (63.64)  | 17 (80.95)  |
|               | elevated               | 5 (22.73)   | 6 (27.27)   | 4 (19.05)   |
|               | significantly elevated | 2 (9.09)    | 2 (9.09)    | 0 (0.00)    |
| Wheat         | not elevated           | 6 (27.27)   | 10 (45.45)  | 7 (33.33)   |
|               | elevated               | 9 (40.91)   | 9 (40.91)   | 13 (61.90)  |
|               | significantly elevated | 7 (31.82)   | 3 (13.64)   | 1 (4.76)    |
| Spelt         | not elevated           | 8 (36.36)   | 10 (45.45)  | 13 (61.90)  |
|               | elevated               | 9 (40.91)   | 9 (40.91)   | 7 (33.33)   |
|               | significantly elevated | 5 (22.73)   | 3 (13.64)   | 1 (4.76)    |
| Rye           | not elevated           | 7 (31.82)   | 11 (50.00)  | 15 (71.43)  |
|               | elevated               | 12 (54.55)  | 9 (40.91)   | 4 (19.05)   |
|               | significantly elevated | 3 (13.64)   | 2 (9.09)    | 2 (9.52)    |
| Poppy seeds   | not elevated           | 17 (77.27)  | 20 (90.91)  | 20 (95.24)  |
|               | elevated               | 4 (18.18)   | 2 (9.09)    | 1 (4.76)    |
|               | significantly elevated | 1 (4.55)    | 0 (0.00)    | 0 (0.00)    |
| Almonds       | not elevated           | 19 (86.36)  | 22 (100.00) | 19 (90.48)  |
|               | elevated               | 3 (13.64)   | 0 (0.00)    | 2 (9.52)    |
|               | significantly elevated | 0 (0.00)    | 0 (0.00)    | 0 (0.00)    |

|                      |                        |            |            |             |
|----------------------|------------------------|------------|------------|-------------|
| Hazelnuts            | not elevated           | 18 (81.82) | 21 (95.45) | 19 (90.48)  |
|                      | elevated               | 3 (13.64)  | 1 (4.55)   | 2 (9.52)    |
|                      | significantly elevated | 1 (4.55)   | 0 (0.00)   | 0 (0.00)    |
| Peanuts              | not elevated           | 15 (68.18) | 18 (81.82) | 17 (80.95)  |
|                      | elevated               | 5 (22.73)  | 4 (18.18)  | 3 (14.29)   |
|                      | significantly elevated | 2 (9.09)   | 0 (0.00)   | 1 (4.76)    |
| Pistachio            | not elevated           | 20 (90.91) | 17 (77.27) | 21 (100.00) |
|                      | elevated               | 1 (4.55)   | 4 (18.18)  | 0 (0.00)    |
|                      | significantly elevated | 1 (4.55)   | 1 (4.55)   | 0 (0.00)    |
| Flax seeds           | not elevated           | 18 (81.82) | 17 (77.27) | 20 (95.24)  |
|                      | elevated               | 4 (18.18)  | 2 (9.09)   | 1 (4.76)    |
|                      | significantly elevated | 0 (0.00)   | 3 (13.64)  | 0 (0.00)    |
| Sunflower seeds      | not elevated           | 13 (59.09) | 20 (90.91) | 19 (90.48)  |
|                      | elevated               | 8 (36.36)  | 1 (4.55)   | 1 (4.76)    |
|                      | significantly elevated | 1 (4.55)   | 1 (4.55)   | 1 (4.76)    |
| Cray fish            | not elevated           | 19 (86.36) | 20 (90.91) | 19 (90.48)  |
|                      | elevated               | 2 (9.09)   | 2 (9.09)   | 2 (9.52)    |
|                      | significantly elevated | 1 (4.55)   | 0 (0.00)   | 0 (0.00)    |
| Cow's milk           | not elevated           | 3 (13.64)  | 8 (36.36)  | 5 (23.81)   |
|                      | elevated               | 7 (31.82)  | 2 (9.09)   | 12 (57.14)  |
|                      | significantly elevated | 12 (54.55) | 12 (54.55) | 4 (19.05)   |
| Milk products        | not elevated           | 5 (22.73)  | 9 (40.91)  | 12 (57.14)  |
|                      | elevated               | 4 (18.18)  | 2 (9.09)   | 7 (33.33)   |
|                      | significantly elevated | 13 (59.09) | 11 (50.00) | 2 (9.52)    |
| Cow's cheese         | not elevated           | 8 (36.36)  | 13 (59.09) | 15 (71.43)  |
|                      | elevated               | 7 (31.82)  | 3 (13.64)  | 5 (23.81)   |
|                      | significantly elevated | 7 (31.82)  | 6 (27.27)  | 1 (4.76)    |
| Goat's milk, cheese  | not elevated           | 9 (40.91)  | 11 (50.00) | 18 (85.71)  |
|                      | elevated               | 9 (40.91)  | 6 (27.27)  | 1 (4.76)    |
|                      | significantly elevated | 4 (18.18)  | 5 (22.73)  | 2 (9.52)    |
| Sheep's milk, cheese | not elevated           | 9 (40.91)  | 11 (50.00) | 17 (80.95)  |
|                      | elevated               | 5 (22.73)  | 7 (31.82)  | 2 (9.52)    |
|                      | significantly elevated | 8 (36.36)  | 4 (18.18)  | 2 (9.52)    |
| Honey                | not elevated           | 17 (77.27) | 19 (86.36) | 16 (76.19)  |
|                      | elevated               | 3 (13.64)  | 3 (13.64)  | 5 (23.81)   |
|                      | significantly elevated | 2 (9.09)   | 0 (0.00)   | 0 (0.00)    |
| Bakery yeast         | not elevated           | 16 (72.73) | 15 (68.18) | 15 (71.43)  |
|                      | elevated               | 4 (18.18)  | 7 (31.82)  | 6 (28.57)   |
|                      | significantly elevated | 2 (9.09)   | 0 (0.00)   | 0 (0.00)    |

interpretation according to manufacturer's descriptions in which values were considered as:  
not elevated for tirtes below 7.5 µg/ml, elevated for tirtes 7.5 – 20.0 µg/ml, significantly  
elevated for tirtes above 20.0 µg/ml
