# Supplementary material for: The Food-Specific Serum IgG Reactivity in Major Depressive Disorder Patients, Irritable Bowel Syndrome Patients and Healthy Controls
Source: MDPI journal article supplement (doi:10.3390/nu10050548), 2018-04-28
Supplement: s1 [file s1]

**Table S2.** Differences in serum IgG levels against tested food proteins

| IgG         | G   | M     | IQR    | Min    | Max     | Kruskal-Wallis H Test for 3 groups |        | Post-hoc analysis |       |
|-------------|-----|-------|--------|--------|---------|------------------------------------|--------|-------------------|-------|
|             |     |       |        |        |         | H                                  | p      | groups            | p     |
| Total IgG   | MDD | 403.9 | 365.10 | 109.68 | 1075.11 | 7.90                               | 0.019  | MDD > HC          | 0,004 |
|             | IBS | 308.6 | 282.10 | 108.07 | 1041.08 |                                    |        |                   |       |
|             | HC  | 219.3 | 70.20  | 130.20 | 657.15  |                                    |        |                   |       |
| Broccoli    | MDD | 5.29  | 3.16   | 1.52   | 21.85   | 6.20                               | 0.045  | MDD > HC          | 0,039 |
|             | IBS | 4.73  | 2.72   | 1.79   | 10.43   |                                    |        |                   |       |
|             | HC  | 3.56  | 1.04   | 1.62   | 6.40    |                                    |        |                   |       |
| Carrot      | MDD | 4.23  | 8.65   | 1.70   | 34.00   | 3.80                               | 0.150  | -                 | -     |
|             | IBS | 4.67  | 3.69   | 1.77   | 10.69   |                                    |        |                   |       |
|             | HC  | 3.55  | 1.77   | 1.23   | 6.53    |                                    |        |                   |       |
| Red cabbage | MDD | 6.31  | 6.23   | 1.77   | 44.06   | 4.21                               | 0.122  | -                 | -     |
|             | IBS | 4.90  | 4.01   | 2.50   | 9.13    |                                    |        |                   |       |
|             | HC  | 3.86  | 1.88   | 1.61   | 13.33   |                                    |        |                   |       |
| Cucumber    | MDD | 3.99  | 4.37   | 1.76   | 36.39   | 3.02                               | 0.220  | -                 | -     |
|             | IBS | 3.82  | 4.33   | 1.97   | 16.47   |                                    |        |                   |       |
|             | HC  | 3.07  | 1.41   | 1.31   | 7.61    |                                    |        |                   |       |
| Bell pepper | MDD | 3.59  | 6.05   | 0.97   | 20.70   | 3.23                               | 0.199  | -                 | -     |
|             | IBS | 4.29  | 5.48   | 1.46   | 23.58   |                                    |        |                   |       |
|             | HC  | 2.39  | 2.38   | 1.09   | 11.51   |                                    |        |                   |       |
| Tomatoes    | MDD | 4.38  | 4.50   | 1.46   | 29.47   | 0.97                               | 0.617  | -                 | -     |
|             | IBS | 4.45  | 4.35   | 1.65   | 20.40   |                                    |        |                   |       |
|             | HC  | 3.94  | 1.92   | 1.41   | 32.64   |                                    |        |                   |       |
| Celery      | MDD | 6.15  | 6.80   | 1.58   | 28.20   | 8.03                               | 0.017* | MDD > HC          | 0,019 |
|             | IBS | 4.53  | 4.74   | 1.52   | 12.43   |                                    |        |                   |       |
|             | HC  | 2.87  | 2.14   | 1.14   | 7.32    |                                    |        |                   |       |
| Soy beans   | MDD | 3.89  | 3.52   | 1.92   | 13.91   | 4.45                               | 0.108  | -                 | -     |
|             | IBS | 2.59  | 2.04   | 2.07   | 26.33   |                                    |        |                   |       |
|             | HC  | 2.73  | 1.72   | 1.65   | 8.01    |                                    |        |                   |       |
| Pineapple   | MDD | 3.82  | 6.15   | 0.83   | 61.53   | 0.63                               | 0.730  | -                 | -     |
|             | IBS | 5.02  | 6.62   | 0.94   | 27.67   |                                    |        |                   |       |
|             | HC  | 2.55  | 5.35   | 1.44   | 17.26   |                                    |        |                   |       |

|               |     |       |       |       |        |       |        |           |       |
|---------------|-----|-------|-------|-------|--------|-------|--------|-----------|-------|
| Watermelon    | MDD | 4.21  | 6.75  | 1.02  | 37.09  | 3.42  | 0.181  | -         | -     |
|               | IBS | 3.06  | 2.75  | 0.92  | 18.68  |       |        |           |       |
|               | HC  | 2.10  | 0.97  | 0.81  | 10.73  |       |        |           |       |
| Cherry        | MDD | 5.15  | 5.57  | 1.24  | 48.20  | 3.49  | 0.175  | -         | -     |
|               | IBS | 4.12  | 3.48  | 1.52  | 21.84  |       |        |           |       |
|               | HC  | 3.43  | 2.53  | 29.47 | 18.14  |       |        |           |       |
| Horseradish   | MDD | 4.08  | 3.66  | 1.42  | 48.10  | 6.98  | 0.030  | MDD > HC  | 0,024 |
|               | IBS | 4.02  | 2.68  | 1.51  | 11.43  |       |        |           |       |
|               | HC  | 2.77  | 0.89  | 1.08  | 6.79   |       |        |           |       |
| Garlic        | MDD | 6.33  | 7.02  | 1.01  | 75.64  | 7.88  | 0.017* | MDD > HC  | 0,015 |
|               | IBS | 2.92  | 4.98  | 0.75  | 15.83  |       |        |           |       |
|               | HC  | 2.49  | 1.19  | 0.95  | 10.77  |       |        |           |       |
| Mustard seeds | MDD | 3.38  | 3.34  | 1.06  | 13.39  | 0.66  | 0.720  | -         | -     |
|               | IBS | 2.73  | 2.68  | 1.42  | 8.76   |       |        |           |       |
|               | HC  | 2.64  | 1.74  | 1.51  | 15.27  |       |        |           |       |
| Pork          | MDD | 3.36  | 1.77  | 2.57  | 6.71   | 1.12  | 0.572  | -         | -     |
|               | IBS | 4.26  | 3.10  | 1.95  | 12.79  |       |        |           |       |
|               | HC  | 3.80  | 1.42  | 1.77  | 13.87  |       |        |           |       |
| Beef          | MDD | 2.51  | 1.14  | 1.45  | 34.16  | 1.21  | 0.545  | -         | -     |
|               | IBS | 2.50  | 1.47  | 1.37  | 7.93   |       |        |           |       |
|               | HC  | 2.91  | 1.59  | 1.59  | 7.12   |       |        |           |       |
| Chicken       | MDD | 3.32  | 2.46  | 1.99  | 9.03   | 0.07  | 0.968  | -         | -     |
|               | IBS | 3.21  | 3.40  | 1.43  | 11.30  |       |        |           |       |
|               | HC  | 3.17  | 3.07  | 1.87  | 8.32   |       |        |           |       |
| Egg           | MDD | 22.85 | 21.82 | 1.77  | 139.19 | 0.35  | 0.839  | -         | -     |
|               | IBS | 22.70 | 32.47 | 2.38  | 134.18 |       |        |           |       |
| Gluten        | MDD | 16.44 | 16.10 | 5.26  | 112.61 | 10.37 | 0.005* | MDD > IBS | 0,010 |
|               | IBS | 8.87  | 10.43 | 2.26  | 117.87 |       |        | MDD > HC  | 0,025 |
|               | HC  | 11.74 | 7.40  | 3.94  | 43.01  |       |        |           |       |
| Barley        | MDD | 5.87  | 11.41 | 1.86  | 42.43  | 3.66  | 0.161  | -         | -     |
|               | IBS | 5.50  | 4.98  | 1.75  | 24.81  |       |        |           |       |
|               | HC  | 3.87  | 2.88  | 1.79  | 19.52  |       |        |           |       |
| Oat           | MDD | 4.83  | 5.94  | 1.33  | 49.89  | 1.88  | 0.392  | -         | -     |
|               | IBS | 6.51  | 10.94 | 1.42  | 86.70  |       |        |           |       |
|               | HC  | 4.18  | 3.46  | 1.35  | 18.49  |       |        |           |       |

|                 |     |       |       |      |        |      |       |           |       |
|-----------------|-----|-------|-------|------|--------|------|-------|-----------|-------|
| Wheat           | MDD | 15.26 | 16.38 | 4.56 | 99.42  | 6.79 | 0.033 | MDD > HC  | 0,043 |
|                 | IBS | 9.31  | 8.05  | 2.28 | 122.13 |      |       |           |       |
|                 | HC  | 8.92  | 5.53  | 3.28 | 47.22  |      |       |           |       |
| Spelt           | MDD | 12.91 | 13.23 | 2.18 | 53.56  | 3.30 | 0.192 | -         | -     |
|                 | IBS | 7.78  | 13.29 | 2.17 | 138.87 |      |       |           |       |
|                 | HC  | 7.24  | 3.17  | 1.91 | 30.91  |      |       |           |       |
| Rye             | MDD | 11.41 | 8.42  | 3.73 | 108.92 | 7.23 | 0.026 | MDD > HC  | 0,032 |
|                 | IBS | 7.38  | 8.14  | 2.10 | 28.52  |      |       |           |       |
|                 | HC  | 5.59  | 4.94  | 2.08 | 38.05  |      |       |           |       |
| Poppy seeds     | MDD | 2.88  | 4.26  | 1.18 | 20.46  | 2.94 | 0.230 | -         | -     |
|                 | IBS | 3.38  | 2.01  | 0.63 | 10.39  |      |       |           |       |
|                 | HC  | 1.93  | 1.70  | 0.83 | 9.72   |      |       |           |       |
| Almonds         | MDD | 1.97  | 2.50  | 0.78 | 10.20  | 0.43 | 0.807 | -         | -     |
|                 | IBS | 2.46  | 2.56  | 0.73 | 5.11   |      |       |           |       |
|                 | HC  | 2.80  | 3.66  | 0.53 | 9.77   |      |       |           |       |
| Hazelnuts       | MDD | 3.78  | 4.23  | 0.87 | 29.18  | 2.49 | 0.288 | -         | -     |
|                 | IBS | 2.37  | 2.78  | 1.09 | 9.89   |      |       |           |       |
|                 | HC  | 1.99  | 1.39  | 0.88 | 14.75  |      |       |           |       |
| Peanuts         | MDD | 5.27  | 7.44  | 2.30 | 96.96  | 3.00 | 0.223 | -         | -     |
|                 | IBS | 5.10  | 4.42  | 1.44 | 14.22  |      |       |           |       |
|                 | HC  | 4.06  | 2.78  | 1.30 | 60.91  |      |       |           |       |
| Pistachio       | MDD | 2.67  | 2.52  | 1.12 | 80.54  | 1.12 | 0.572 | -         | -     |
|                 | IBS | 3.02  | 5.87  | 0.93 | 95.86  |      |       |           |       |
|                 | HC  | 2.10  | 1.93  | 1.25 | 6.71   |      |       |           |       |
| Flax seeds      | MDD | 2.93  | 3.86  | 1.04 | 12.25  | 3.10 | 0.213 | -         | -     |
|                 | IBS | 3.86  | 4.00  | 0.94 | 41.65  |      |       |           |       |
|                 | HC  | 2.34  | 1.87  | 0.88 | 15.03  |      |       |           |       |
| Sunflower seeds | MDD | 6.22  | 5.84  | 1.43 | 46.15  | 7.07 | 0.029 | MDD > IBS | 0,038 |
|                 | IBS | 3.06  | 2.94  | 0.91 | 68.05  |      |       |           |       |
|                 | HC  | 3.13  | 2.45  | 0.74 | 61.62  |      |       |           |       |
| Cray fish       | MDD | 3.48  | 3.84  | 1.62 | 23.13  | 1.96 | 0.375 | -         | -     |
|                 | IBS | 2.95  | 1.86  | 1.66 | 8.59   |      |       |           |       |
|                 | HC  | 3.56  | 1.47  | 1.64 | 10.10  |      |       |           |       |

|                      |     |       |       |      |        |      |       |          |       |
|----------------------|-----|-------|-------|------|--------|------|-------|----------|-------|
| Cow's milk           | MDD | 35.41 | 57.53 | 2.69 | 143.30 | 5.20 | 0.074 | -        | -     |
|                      | IBS | 29.63 | 53.70 | 1.43 | 140.91 |      |       |          |       |
|                      | HC  | 10.05 | 6.52  | 1.41 | 425.90 |      |       |          |       |
| Milk products        | MDD | 27.57 | 39.82 | 1.62 | 110.57 | 7.59 | 0.025 | MDD > HC | 0,019 |
|                      | IBS | 20.00 | 42.78 | 1.24 | 119.30 |      |       |          |       |
|                      | HC  | 6.86  | 5.46  | 0.96 | 86.24  |      |       |          |       |
| Cow's cheese         | MDD | 8.81  | 25.55 | 1.97 | 200.74 | 4.86 | 0.088 | -        | -     |
|                      | IBS | 6.72  | 16.70 | 2.04 | 58.96  |      |       |          |       |
|                      | HC  | 4.46  | 3.85  | 1.92 | 179.43 |      |       |          |       |
| Goat's milk, cheese  | MDD | 9.48  | 15.56 | 1.22 | 94.57  | 2.93 | 0.231 | -        | -     |
|                      | IBS | 7.08  | 11.37 | 1.48 | 98.37  |      |       |          |       |
|                      | HC  | 4.39  | 2.71  | 1.30 | 32.45  |      |       |          |       |
| Sheep's milk, cheese | MDD | 11.38 | 19.79 | 1.75 | 127.68 | 4.50 | 0.106 | -        | -     |
|                      | IBS | 8.16  | 13.58 | 1.60 | 112.14 |      |       |          |       |
|                      | HC  | 5.15  | 4.40  | 1.72 | 56.41  |      |       |          |       |
| Honey                | MDD | 4.61  | 4.07  | 2.04 | 29.86  | 0.76 | 0.686 | -        | -     |
|                      | IBS | 4.10  | 2.33  | 2.04 | 17.75  |      |       |          |       |
|                      | HC  | 4.37  | 3.48  | 1.47 | 13.83  |      |       |          |       |
| Bakery yeast         | MDD | 5.36  | 3.73  | 2.53 | 26.15  | 0.93 | 0.628 | -        | -     |
|                      | IBS | 5.43  | 5.57  | 2.41 | 16.15  |      |       |          |       |
|                      | HC  | 4.34  | 4.40  | 1.92 | 17.26  |      |       |          |       |

\*differences statistically significant also after *post-hoc* analysis

G – group; M – median; IQR - interquartile range; H – H-value; p – p-value
